# Supplementary material for: Detection of proteins by hyphenated techniques with endogenous metal tags and metal chemical labelling
Source: Royal Society of Chemistry journal article supplement (doi:10.1039/c4an00722k), 2014-01-01
Supplement: c4an00722k1.pdf [file c4an00722k1.pdf]

## ELECTRONIC SUPPLEMENTARY INFORMATION to

# Detection of Proteins by Hyphenated Techniques with Endogenous Metal Tags and Metal Chemical Labelling

Beatrice Campanella, Emilia Bramanti

National Research Council of Italy, C.N.R., Istituto di Chimica dei Composti Organo Metallici-  
ICCOM- UOS Pisa, Area di Ricerca, Via G. Moruzzi 1, 56124 Pisa (Italy)

**\*Corresponding author:** Emilia Bramanti, e-mail: [bramanti@pi.iccom.cnr.it](mailto:bramanti@pi.iccom.cnr.it)

**Table 1.** Analytical methods for the species-selective analysis of selenoproteins/peptides by hyphenated techniques with element-selective detection.

| Analyte                                            | Sample type                               | Separation technique                 | Column                                                                                         | Eluent                                                                                                                                                                                                                                                                                                | Detector                                      | Detection limit                                                                                     | Ref. |
|----------------------------------------------------|-------------------------------------------|--------------------------------------|------------------------------------------------------------------------------------------------|-------------------------------------------------------------------------------------------------------------------------------------------------------------------------------------------------------------------------------------------------------------------------------------------------------|-----------------------------------------------|-----------------------------------------------------------------------------------------------------|------|
| SeCys<br>GPx<br>SelP<br>SelAlb                     | Human serum                               | Affinity HPLC                        | Hitrap Heparin-Sephacel (HEP) (5 cm×1.0 mm id)<br>Hitrap Blue-Sephacel (BLUE) (5 cm×1.0 mm id) | (A): 0.05 M ammonium acetate, pH~7<br>(B): 1.5 M ammonium acetate, pH~7                                                                                                                                                                                                                               | ICP - sector field-MS in high resolution mode | 2.5 ng mL <sup>-1</sup> for SeCys                                                                   | 86   |
| GPx<br>SelP<br>SelAlb                              | Human serum reference material (BCR-637)  | Affinity HPLC                        | Hitrap Heparin-Sephacel and Hitrap blue-Sephacel (1 mL each)                                   | (A): 0.02 M Tris-HCl buffer, pH 7.4<br>(B): A + 1.4 M ammonium acetate, pH 7.4<br><i>SDS:</i><br>NuPAGE® MES SDS Running Buffer<br><i>RPC:</i>                                                                                                                                                        | ICP-quadrupole-MS                             | 0.4 ng mL <sup>-1</sup> (GPx)<br>2.0 ng mL <sup>-1</sup> (SelP)<br>1.0 ng mL <sup>-1</sup> (SelAlb) | 88   |
| SelP isoforms                                      | Human serum reference material (SRM 1950) | SDS-PAGE<br>Nano reversed phase HPLC | Nano cHiPLC column (15 cm×75 µm, ChromXP C18-CL 3 µm)                                          | (A): water/0.1% formic acid<br>(B): acetonitrile/0,1% formic acid<br>Gradient: from 2-25.8% B in 75 min and from 25.8- 90% B in 10 min<br>(A): 10 mM Tris-acetic acid buffer, pH 8.0<br>(B): A + 500 mM ammonium acetate, pH 8.0<br>Gradient: 100% A for 3 min; 0-40% B in 7 min; 40-100% B in 6 min; | ICP-MS<br>ESI-linear triple quadrupole-MS     | NR                                                                                                  | 89   |
| GPx<br>SelP<br>SelAlb<br>Two unknown selenospecies | Human plasma                              | Anion exchange HPLC                  | ProPac SAX-10 (250 mm×2 mm id, 10 µm particles)                                                | (A): 10 mM Tris-acetic acid buffer, pH 8.0<br>(B): A + 500 mM ammonium acetate, pH 8.0<br>Gradient: 100% A for 3 min; 0-40% B in 7 min; 40-100% B in 6 min;                                                                                                                                           | ICP-dynamic reaction cell-quadrupole-MS       | 0.59 pmol mL <sup>-1</sup> (SelP)<br>1.7 pmol mL <sup>-1</sup> (GPx)                                | 82   |

| Analyte               | Sample type                                                   | Separation technique                                                       | Column                                                                                                                                                                                         | Eluent                                                                                                                                                                                                                                                                                                                                                                                                                                                                                           | Detector                           | Detection limit                            | Ref. |
|-----------------------|---------------------------------------------------------------|----------------------------------------------------------------------------|------------------------------------------------------------------------------------------------------------------------------------------------------------------------------------------------|--------------------------------------------------------------------------------------------------------------------------------------------------------------------------------------------------------------------------------------------------------------------------------------------------------------------------------------------------------------------------------------------------------------------------------------------------------------------------------------------------|------------------------------------|--------------------------------------------|------|
| GPx<br>SeIP<br>SeIAlb | Human plasma standard reference material (SRM 1950)           | Affinity HPLC<br>Nano-reversed phase HPLC                                  | <i>AFC:</i><br>PEEK columns (50 mm×4 mm id) packed with heparin-Sepharose (HEP) or blue-Sepharose (BLUE)<br><i>RPC:</i><br>ChromXP C <sub>18</sub> -CL (15 cm×75 μm id, 3 μm particles, 120 Å) | 100% B for 19 min<br><i>AFC:</i><br>(A): 50 mM ammonium acetate<br>(B): 1.5 M ammonium acetate<br>Gradient: from 0-100% B in 6 min<br><i>RPC:</i><br>(A): water/0.1% formic acid<br>(B): acetonitrile/0.1% formic acid<br>Gradient: from 2-25.8% B in 75 min; 25.8-90% B in 10 min<br><i>SDS:</i><br>NuPAGE® MES SDS Running Buffer<br><i>RPC:</i><br>(A): water/0.1% formic acid<br>(B): acetonitrile/0.1% formic acid<br>Gradient: from 2–25% B in 75 min; 25–85% B in 10 min; 90% B for 9 min | LA-ICP MS<br>ESI-LTQ ion trap-MS   | NR                                         | 90   |
| SeIP<br>GPx3          | Human plasma candidate standard reference material (SRM 1950) | SDS-PAGE<br>Electroblotting onto PVDF membrane<br>Nano reversed phase HPLC | <i>RPC:</i><br>BioBasic C18 IntegraFrit column (100 cm×10 μm id)                                                                                                                               | (A): water/0.1% formic acid<br>(B): acetonitrile/0.1% formic acid<br>Gradient: from 2–25% B in 75 min; 25–85% B in 10 min; 90% B for 9 min                                                                                                                                                                                                                                                                                                                                                       | LA-ICP-MS<br>ESI-LTQ ion trap-MS   | 8 ng of GPx1 for electroblotting-LA-ICP MS | 91   |
| GPx                   | Selenium-yeast candidate reference material                   | SDS-PAGE                                                                   | -                                                                                                                                                                                              | -                                                                                                                                                                                                                                                                                                                                                                                                                                                                                                | Electrothermal vaporization-ICP MS | 40 pg Se per band                          | 92   |
| Selenomethionine      | Yeast                                                         | Gas                                                                        | DB-5MS                                                                                                                                                                                         | Carrier gas: helium                                                                                                                                                                                                                                                                                                                                                                                                                                                                              | ICP-sector field-                  | 1.0 μg g <sup>-1</sup>                     | 93   |

| Analyte                                  | Sample type                    | Separation technique                                 | Column                                                                                                                        | Eluent                                                                                                                                                                                                                                                                                                                                                      | Detector                      | Detection limit                                                                                                                            | Ref. |
|------------------------------------------|--------------------------------|------------------------------------------------------|-------------------------------------------------------------------------------------------------------------------------------|-------------------------------------------------------------------------------------------------------------------------------------------------------------------------------------------------------------------------------------------------------------------------------------------------------------------------------------------------------------|-------------------------------|--------------------------------------------------------------------------------------------------------------------------------------------|------|
| Selenomethionine<br>Selenocysteine       | extracts                       | chromatography                                       |                                                                                                                               |                                                                                                                                                                                                                                                                                                                                                             | MS                            |                                                                                                                                            |      |
|                                          | Human serum                    | Size exclusion HPLC<br>Capillary reversed phase HPLC | <i>SEC:</i><br>HiLoad 26/60 Superdex 30 Prep<br><i>RPC:</i><br>Hypersil C <sub>18</sub> BDS (15 cm×300 μm id, 3 μm particles) | <i>SEC:</i><br>10 mM ammonium acetate, pH 9.5<br><i>RPC:</i><br>(A): 5% acetonitrile/0.1% trifluoroacetic acid<br>(B): 95% acetonitrile/0.1% trifluoroacetic acid<br>Gradient: from 10-60% B in 15 min; 60% B for 5 min                                                                                                                                     | ICP-octapole reaction cell-MS | 0.5 ng of Se/g of serum                                                                                                                    | 94   |
| SeIP                                     | Sub-μL samples of human plasma | Size exclusion HPLC<br>Affinity HPLC                 | <i>SEC:</i><br>Asahipak GS-520 (300 mm×7.6 mm id)<br><i>AFC:</i><br>AFpak AHR-894 (150 m×4.6 mm id)                           | <i>SEC:</i><br>50 mM Tris-HNO <sub>3</sub> , pH 7.4<br><i>AFC:</i><br>20 mM Tris-HNO <sub>3</sub> + 1.4 M ammonium acetate, pH 7.4<br>(A): water/0.1% trifluoroacetic acid<br>(B): methanol/0.1% trifluoroacetic acid<br>Gradient: from 10-25% B in 5 min; 25-32% B in 15 min; 32-37% B in 5 min; 37% B for 10 min; 37-42% B in 10 min, 42-100% B in 5 min. | Low flow ICP-MS               | 0.15 ng mL <sup>-1</sup> (Nebulizer PFA100)<br>0.72 ng mL <sup>-1</sup> (Nebulizer PFA 20)<br>0.49 ng mL <sup>-1</sup> (Nebulizer CEI 100) | 87   |
| Mixture with more than 30 selenopeptides | Selenized yeast extract        | Capillary reversed phase HPLC                        | Hypersil C <sub>18</sub> BDS (15 cm×300 μm id, 3 μm particles)                                                                | Gradient: from 10-25% B in 5 min; 25-32% B in 15 min; 32-37% B in 5 min; 37% B for 10 min; 37-42% B in 10 min, 42-100% B in 5 min.                                                                                                                                                                                                                          | ICP-collision cell-MS         | 150 fg ( <sup>80</sup> Se)<br>200 fg ( <sup>82</sup> Se)                                                                                   | 55   |
| GPx                                      | Human plasma                   | Size exclusion                                       | <i>SEC:</i>                                                                                                                   | <i>SDS-PAGE:</i>                                                                                                                                                                                                                                                                                                                                            | ICP-MS                        | NR                                                                                                                                         | 95   |

| Analyte                    | Sample type                                                            | Separation technique                                 | Column                                                                                                                                                                   | Eluent                                                                                                                                                                                                                                                                                                    | Detector                                                              | Detection limit           | Ref. |
|----------------------------|------------------------------------------------------------------------|------------------------------------------------------|--------------------------------------------------------------------------------------------------------------------------------------------------------------------------|-----------------------------------------------------------------------------------------------------------------------------------------------------------------------------------------------------------------------------------------------------------------------------------------------------------|-----------------------------------------------------------------------|---------------------------|------|
| SelP<br>SelAlb             |                                                                        | HPLC<br>Capillary reversed phase<br>HPLC<br>SDS-PAGE | Superdex G-75 HR 10/30<br><i>RPC</i> :<br>C <sub>18</sub> PepMap (15 cm×300 μm id, 3 μm particles)                                                                       | 25 mM Tris buffer + 3.5 mM SDS + 192 mM L-glycine<br><i>SEC</i> :<br>50 mM ammonium acetate, pH 7<br><i>RPC</i> :<br>(A): water/0.1% trifluoroacetic acid<br>(B): methanol/0.1% trifluoroacetic acid<br>Gradient: 5% B for 2 min; 5–60% B in 48 min; 60–90% B in 5 min; 90% B for 3 min; 90–5% B in 7 min |                                                                       |                           |      |
| GPx<br>SelP<br>SelAlb      | Human serum samples and reference materials                            | Double affinity followed by size exclusion HPLC      | <i>AFC</i> :<br>Heparin Sepharose (HEP-HP) and Blue Sepharose (BLUE-HP) (5 cm×4.6 mm id)<br><i>SEC</i> :<br>Shodex Asahipak GS-520 HQ (300 mm×7.6 mm id, 7 μm particles) | (Binding buffer): 0.05 M ammonium acetate, pH~7<br>(Elution buffer): 1.5 M ammonium acetate, pH~7                                                                                                                                                                                                         | ICP-MS                                                                | NR                        | 80   |
| Selenomethionyl calmodulin | Protein obtained by heterologous expression in <i>Escherichia coli</i> | Reversed phase nano HPLC                             | C <sub>18</sub> PepMap (15 cm×75 mm id, 3 μm particles, 100Å)                                                                                                            | (A): 0.1% trifluoroacetic acid in water<br>(B): 0.1% trifluoroacetic acid in acetonitrile<br>Gradient: 5% B isocratic in 3 min, 5–25% B in 5 min, 25–37% B in 9 min,                                                                                                                                      | ICP-octapole reaction cell-MS<br>ESI-<br>quadrupole/time of flight-MS | 40 fg ( <sup>80</sup> Se) | 96   |

| Analyte               | Sample type            | Separation technique                 | Column                                                                                                                                                        | Eluent                                                                                                                                                                                                                                                                                                    | Detector                      | Detection limit       | Ref. |
|-----------------------|------------------------|--------------------------------------|---------------------------------------------------------------------------------------------------------------------------------------------------------------|-----------------------------------------------------------------------------------------------------------------------------------------------------------------------------------------------------------------------------------------------------------------------------------------------------------|-------------------------------|-----------------------|------|
| SeIP                  | Human and mouse plasma | Affinity HPLC<br>Size exclusion HPLC | <i>AFC:</i><br>Heparin AHR-894 (50 mm×8.0 mm id)<br><i>SEC:</i><br>Asahipak GS-520 7G (500 mm×7.5 mm id) + guard column Asahipak GS-2G 7B (50 mm × 7.5 mm id) | 37–45% B in 8 min; 45% B isocratic in 14 min, 45–90% B in 1 min, 90% B isocratic in 3 min<br><br>(Binding buffer): 50 mM Tris–HNO <sub>3</sub> buffer, pH 7.4<br>(Elution buffer): A + 1.4 M ammonium acetate.                                                                                            | ICP-MS                        | NR                    | 97   |
| GPx<br>SeIP<br>SeIAlb | Human serum            | Anion exchange HPLC<br>Affinity HPLC | <i>AEC:</i><br>Mono Q 5/5 FPLC analytical column (50×5 mm id)<br><i>AFC:</i><br>Hitrap Heparin–Sepharose and Hitrap blue-Sepharose (1 mL each)                | <i>AEC:</i><br>(A): 0.05 M Tris-HCl buffer, pH 7.4<br>(B): A + 0.5 M ammonium acetate, pH 7.4<br>Gradient: 100% A for 2 min; 0-15% B in 6 min; 15- 45% B in 6 min; 45-100% B in 5 min; 100% B for 21 min<br><i>AFC:</i><br>(A): 0.02 M Tris-HCl buffer, pH 7.4<br>(B): A + 1.4 M ammonium acetate, pH 7.4 | ICP-octapole reaction cell-MS | NR                    | 98   |
| GPx<br>Formate        | Bacterial cultures of  | SDS-PAGE<br>Size exclusion           | <i>SEC:</i><br>Superdex 200 HR 10/30                                                                                                                          | <i>SDS-PAGE:</i><br>25 mM Tris buffer + 3.5                                                                                                                                                                                                                                                               | LA-ICP-MS<br>ICP-MS           | Low-femtomolar levels | 99   |

| Analyte                     | Sample type                                                  | Separation technique                                                                                             | Column                                                                                                                                                                                                                                                               | Eluent                                                                                                                                                                                                              | Detector                                                        | Detection limit  | Ref. |
|-----------------------------|--------------------------------------------------------------|------------------------------------------------------------------------------------------------------------------|----------------------------------------------------------------------------------------------------------------------------------------------------------------------------------------------------------------------------------------------------------------------|---------------------------------------------------------------------------------------------------------------------------------------------------------------------------------------------------------------------|-----------------------------------------------------------------|------------------|------|
| dehydrogenase selenoprotein | <i>Desulfococcus multivorans</i> and <i>Escherichia coli</i> | HPLC                                                                                                             | column                                                                                                                                                                                                                                                               | mM SDS + 192 mM L-glycine<br><i>SEC</i> :<br>10 mM ammonium acetate, pH 7.5                                                                                                                                         |                                                                 |                  |      |
| GPx3<br>SelP<br>SelAlb      | Human serum form patients with colorectal cancer             | Anion exchange HPLC<br>Double affinity HPLC                                                                      | <i>AFC</i> :<br>Hitrap Heparin–Sephacrose and Hitrap blue-Sephacrose (5 cm×4.6 mm id)<br><i>AEC</i> :<br>Styrene divinylbenzene with quaternary ammonium functional groups (5 cm×4.6 mm id, 45–150 µm particles)<br>DB-5MS (30 m×0.25 mm id×0.25 µm d <sub>f</sub> ) | (Binding buffer): 0.02 M Tris-HCl buffer, pH 7.4<br>(Elution buffer): A + 1.4 M ammonium acetate, pH 7.4                                                                                                            | ICP-quadrupole-MS                                               | NR               | 100  |
| Selenomethionine            | Selenium-enriched yeast                                      | Gas chromatography                                                                                               |                                                                                                                                                                                                                                                                      | Carrier gas: helium                                                                                                                                                                                                 | MS                                                              | NR               | 101  |
| Se-rich glutenins           | Wheat                                                        | Isoelectric focusing separation<br>1-D SDS-PAGE<br>IEF/SDS-PAGE<br>2D gel electrophoresis<br>Reversed phase HPLC | <i>RPC</i> :<br>C <sub>18</sub> Zorbax 300SB (100 mm × 0.3 mm id, 3.5 µm particles)                                                                                                                                                                                  | <i>RPC</i> :<br>(A): 0.1% formic acid in water<br>(B): 0.1% formic acid in acetonitrile<br>Gradient: 2% B for 2 min, from 2–5% B in 3 min, 5–25% B in 30 min, 25–40% B in 5 min, 40–97% B in 5 min; 97% B for 5 min | LA-ICP-MS<br>ICP-MS<br>ESI-linear triple quadrupole/Orbitrap-MS | Attomolar levels | 102  |

**Table 2.** Analytical methods for the species-selective analysis of iron-containing proteins by hyphenated techniques with element-selective detection.

| Analyte                           | Sample type                                                             | Separation technique                                           | Column                                                                                                                                                                                      | Eluent                                                                                                                                               | Detector                                                                    | Detection limits                                                                         | Ref. |
|-----------------------------------|-------------------------------------------------------------------------|----------------------------------------------------------------|---------------------------------------------------------------------------------------------------------------------------------------------------------------------------------------------|------------------------------------------------------------------------------------------------------------------------------------------------------|-----------------------------------------------------------------------------|------------------------------------------------------------------------------------------|------|
| Myoglobin<br>Ferritin             | Raw and cooked<br>beef steak                                            | Size exclusion<br>HPLC                                         | Progel TSK Gel<br>G2000SW <sub>XL</sub> (300 mm×7.6<br>mm id, 10 µm particles, 125<br>Å) + guard column Progel<br>TSK Gel G2000SW <sub>XL</sub><br>(5×7.6 mm id, 10 µm<br>particles, 125 Å) | 0.1 M<br>Tris(hydroxymethyl)aminomet<br>hane hydrochloride pH 7.2                                                                                    | ICP-double-<br>focusing sector<br>field-MS                                  | 0.0024 µg as<br>iron                                                                     | 106  |
| Transferrin                       | Serum samples<br>from human and<br>harbour seals                        | Anion exchange<br>HPLC                                         | PorosHQ (100 mm×2.1 mm<br>id, 10 µm particles)                                                                                                                                              | (A): 20 mM Bis-Tris, pH 6.5,<br>10 µg L <sup>-1</sup> Ge<br>(B): 20 mM Bis-Tris, 500 mM<br>ammonium acetate, pH 6.5, 10<br>µg L <sup>-1</sup> Ge, Cs | ICP-octapole<br>reaction cell-MS                                            | 123 µg as<br>transferrin                                                                 | 107  |
| Transferrin<br>isoforms           | Human serum<br>from healthy<br>individuals and<br>alcoholic<br>patients | Anion exchange<br>HPLC                                         | Mono Q HR 5/5 (50 mm×5<br>mm id)                                                                                                                                                            | (A): 25 mM Tris-HAc buffer,<br>pH 6.5<br>(B): A + 250 mM ammonium<br>acetate<br>Gradient from 0%-75% B in 45<br>min                                  | ICP-octapole<br>reaction cell-MS<br>ESI-<br>quadrupole/time<br>of flight-MS | 15 ng mL <sup>-1</sup> Fe<br>in a low<br>abundance<br>form of<br>transferrin             | 69   |
| Nine<br>transferrin<br>glycoforms | Blood samples<br>of harbour seals                                       | Anion exchange<br>HPLC                                         | PorosHQ (100 mm×2.1 mm<br>id, 10 µm particles)                                                                                                                                              | (A): 20 mM Bis-Tris, pH 6.5,<br>10 µg L <sup>-1</sup> Ge<br>(B): 20 mM Bis-Tris, 500 mM<br>Ammonium acetate, pH 6.5, 10<br>µg L <sup>-1</sup> Ge, Cs | ICP-octapole<br>reaction cell-MS                                            | 55.2 µg mL <sup>-1</sup><br>as transferrin                                               | 108  |
| Five<br>transferrin<br>isoforms   | Human serum                                                             | Capillary zone<br>electrophoresis<br>or anion<br>exchange HPLC | <i>AEC:</i><br>Pharmacia, Mono Q 5/5 HR<br><i>CE capillary:</i><br>50 µm i.d×75 cm                                                                                                          | <i>AEC:</i><br>(A): 25 mM Tris-HCl buffer,<br>pH 6<br>(B): A + 250 mM ammonium<br>acetate                                                            | UV<br>ICP-octapole<br>reaction cell-MS                                      | 0.27-0.37<br>µmol L <sup>-1</sup> CZE-<br>UV<br>14-27 µmol L <sup>-1</sup><br>CZE-ICP MS | 109  |



| Analyte                                                   | Sample type                       | Separation technique                                         | Column                                                                                                                                            | Eluent                                                                                                                                                                                                                                                                                                                                                                                                                                                                                                                            | Detector                                                                    | Detection limits                                                                                        | Ref. |
|-----------------------------------------------------------|-----------------------------------|--------------------------------------------------------------|---------------------------------------------------------------------------------------------------------------------------------------------------|-----------------------------------------------------------------------------------------------------------------------------------------------------------------------------------------------------------------------------------------------------------------------------------------------------------------------------------------------------------------------------------------------------------------------------------------------------------------------------------------------------------------------------------|-----------------------------------------------------------------------------|---------------------------------------------------------------------------------------------------------|------|
| Myoglobin<br>Holo-<br>transferrin                         | Proteins<br>standard<br>solutions | Size exclusion<br>HPLC<br>Reversed phase<br>HPLC             | <i>SEC:</i><br>Sephadex G-50 Fine (370<br>cm×16 mm id)<br><i>RPC:</i><br>Polyester C-CP fibers in<br>stainless steel column (150<br>mm×4.6 mm id) | Gradient: from 0-75% B in 45<br>min<br><i>CE:</i><br>15 mM borate buffer, pH 8.5 +<br>3 mM diaminobutane                                                                                                                                                                                                                                                                                                                                                                                                                          | ICP-OES<br>Particle<br>beam/hollow<br>cathode-OES                           | 0.05-0.15<br>μmol L <sup>-1</sup><br>HPLC-UV<br>0.02-0.04<br>μmol L <sup>-1</sup><br>HPLC-ICP MS        | 110  |
|                                                           |                                   |                                                              |                                                                                                                                                   | <i>SEC:</i><br>100% Nanopure water at pH 5<br><i>RPC:</i><br>Nanopure water<br>containing/0.1% trifluoroacetic<br>acid, pH 5                                                                                                                                                                                                                                                                                                                                                                                                      |                                                                             | 0.9 ng mL <sup>-1</sup><br>(for ICP OES)<br>and 41.9 ng<br>mL <sup>-1</sup> (for<br>PB/HC-OES)<br>as Fe |      |
| β <sub>2</sub> -transferrin                               | Cerebrospinal<br>fluid            | Anion exchange<br>HPLC                                       | Mono Q HR 5/5 (50 mm×5<br>mm id)                                                                                                                  | (A): 25 mM Tris-HAc buffer,<br>pH 6.5<br>(B): A + 250 mM ammonium<br>acetate<br>Gradient from 0-75% B in 45<br>min<br><i>SDS-PAGE and Anodal PAGE:</i><br>Separating gel buffer: 27.30 g<br>of Tris in 80 mL, pH 8.8<br>Stacking gel buffer: 6 g of Tris<br>in 60 mL of water, pH is 6.8<br>Electrode running buffer:<br>30.3 g of Tris and 144.0 g of<br>glycine in 1 L of water, pH 8.3.<br>Elution buffer: 0.02 M Tris pH<br>8.3.<br><i>Cathodal PAGE:</i><br>Separating gel buffer: 5 g<br>of Tris in 1 L of distilled water, | ICP-octapole<br>reaction cell-MS<br>ESI-<br>quadrupole/time<br>of flight-MS | NR                                                                                                      | 111  |
| Cytochrome<br>C<br>Haemoglobin<br>Transferrin<br>Ferritin | Proteins<br>standard<br>solutions | SDS-PAGE<br>Anodal native<br>PAGE<br>Cathodal native<br>PAGE | -                                                                                                                                                 |                                                                                                                                                                                                                                                                                                                                                                                                                                                                                                                                   | ICP-MS                                                                      | Ranging from<br>0.17 to 0.76 ng<br>as Fe                                                                | 112  |

| Analyte                               | Sample type                                                | Separation technique | Column                                                               | Eluent                                                                                                                                                                                                                                                                                                                                                                                                                   | Detector                                                          | Detection limits                                      | Ref. |
|---------------------------------------|------------------------------------------------------------|----------------------|----------------------------------------------------------------------|--------------------------------------------------------------------------------------------------------------------------------------------------------------------------------------------------------------------------------------------------------------------------------------------------------------------------------------------------------------------------------------------------------------------------|-------------------------------------------------------------------|-------------------------------------------------------|------|
| Ferritin                              | Edible plant seeds                                         | Anion exchange HPLC  | Diethylaminoethyl Sepharose (10 cm×0.7 cm id)                        | pH 5<br>Anode buffer: 26.24 g of 6-aminocaproic acid in 1 L of water, pH 5.3<br>Cathode buffer: the same buffer as separating gel.<br>Elution buffer: 0.02 M Tris with HCl at a pH 7.<br>(A): 20 mM Tris + 1 mM EDTA, pH 7.4<br>(B): 20 mM Tris + 1 mM EDTA + 100 mM NaCl, pH 7.4<br>(C): 20 mM Tris + 300 mM NaCl + 1 mM EDTA, pH 7.4<br>(A): 50 mM ammonium malonate + 0.2 g L <sup>-1</sup> NaN <sub>3</sub> , pH 5.7 | Sector field-MS                                                   | 0.06 µg of ferritin                                   | 113  |
| Glycated and non-glycated haemoglobin | Human blood from healthy individuals and diabetic patients | Cation exchange HPLC | Cation Exchange Mono S 4.6/100 PE (100 mm×10 mm id, 10 µm particles) | (B): A + 250 mM ammonium acetate, pH 5.7<br>Gradient: from 0-60% B in 6 min; 60-75% B in 4 min; 75-100% B in 5 min                                                                                                                                                                                                                                                                                                       | ICP-octapole reaction cell-MS<br>ESI-quadrupole/time of flight-MS | 0.97±0.02 µg mL <sup>-1</sup> of glycated haemoglobin | 114  |

**Table 3.** Analytical methods for the species-selective analysis of copper-containing proteins by hyphenated techniques with element-selective detection.

| Analyte                                     | Sample type                                                           | Separation technique                                                        | Column                                                                                                                                                                              | Eluent                                                                                                                                                                                                                                                                                                                           | Detector                                              | Detection limits                             | Ref. |
|---------------------------------------------|-----------------------------------------------------------------------|-----------------------------------------------------------------------------|-------------------------------------------------------------------------------------------------------------------------------------------------------------------------------------|----------------------------------------------------------------------------------------------------------------------------------------------------------------------------------------------------------------------------------------------------------------------------------------------------------------------------------|-------------------------------------------------------|----------------------------------------------|------|
| Superoxide dismutase                        | Tissue samples from bovine liver                                      | Non denaturing 1-D PAGE                                                     | -                                                                                                                                                                                   | Running buffer: 25 mM Tris-base + 192 mM glycine solution<br><i>RPC:</i><br>(A): water/5% acetic acid<br>(B): acetonitrile/5% acetic acid<br>Gradient: from 10-50% B in 1 min; 50% B for 5 min                                                                                                                                   | LA-ICP-MS                                             | 0.5 µg of protein                            | 68   |
| Four native and recombinant copper proteins | Cell extracts from <i>Escherichia. coli</i> and <i>Synechocystis</i>  | Capillary reversed phase HPLC<br>Size exclusion HPLC<br>Anion exchange HPLC | <i>RPC:</i><br>Poroshell SB C <sub>8</sub> (0.5 mm×75 mm)<br><i>SEC:</i><br>Sephadex G25 superfine (350mm ×2.0 mm)<br><i>AEC:</i><br>TSK-DEAE-NPR column (particle diameter 2.5 µm) | <i>SEC:</i><br>150 mM NaCl + 20 mM Tris-HCl, pH 7.4<br><i>AE:</i><br>(A): 20 mM Tris, pH 8.5<br>(B): 1 M NaCl + 20 mM Tris, pH 8.5<br>Gradient: from 0-50% B in 10 min<br><i>SEC:</i><br>0.1M Tris, pH 7<br><i>RPC:</i><br>(A): water/0.1% formic acid<br>(B): acetonitrile/0.1% formic acid<br>Gradient: from 0-95% B in 60 min | ICP-dynamic reaction cell-MS<br>ESI-time of flight-MS | Ranging from 650 to 800 fmol of plastocyanin | 117  |
| Ceruloplasmin                               | Human serum from four different diseases and a set of normal controls | Size exclusion HPLC<br>Reversed phase HPLC                                  | <i>SEC:</i><br>Silica TSKGel SW3000 (30 mm×4.6 mm id, 4 µm particles)<br><i>RPC:</i><br>Zorbax 300SB-C <sub>18</sub> (75 µm×150 mm, 3.5 µm particles)                               | (A): water/0.1% formic acid<br>(B): acetonitrile/0.1% formic acid<br>Gradient: from 0-95% B in 60 min                                                                                                                                                                                                                            | ICP-octapole reaction cell-MS<br>ESI-ion trap-MS      | 0.01 mg ml <sup>-1</sup> of ceruloplasmin    | 118  |

---

|                                     |                                                                                        |                        |                                                                    |                                                              |                                 |                                                                                                               |     |
|-------------------------------------|----------------------------------------------------------------------------------------|------------------------|--------------------------------------------------------------------|--------------------------------------------------------------|---------------------------------|---------------------------------------------------------------------------------------------------------------|-----|
| Transcuprein<br>Ceruloplasmin       | Human plasma<br>from healthy<br>subjects and an<br>untreated Wilson<br>disease patient | Size exclusion<br>HPLC | BioSep-SEC-S 2000 and<br>Biosep-SEC-S 3000 (300<br>mm×7.8 mm both) | 200 mM NH <sub>4</sub> NO <sub>3</sub>                       | ICP-dynamic<br>reaction cell-MS | Ranging from<br>4.8 to 27 nmol<br>L <sup>-1</sup> based on<br>the method<br>used (flow<br>injection or<br>LC) | 119 |
| Albumin-<br>copper<br>Ceruloplasmin | Human serum                                                                            | Size exclusion<br>HPLC | Superose 12HR                                                      | 0.1 M Tris-HCl buffer +<br>2.5 mM CaCl <sub>2</sub> , pH 7.4 | ICP-quadrupole-<br>MS           | 1 ng ml <sup>-1</sup> as Cu                                                                                   | 120 |

---

**Table 4.** Analytical methods for the species-selective analysis of metallothioneins by hyphenated techniques with element-selective detection.

| Analyte                              | Sample type                                                 | Separation technique                       | Column                                                                                                            | Eluent                                                                                                                                                                                                                                                                                                               | Detector                                        | Detection limits                                  | Ref. |
|--------------------------------------|-------------------------------------------------------------|--------------------------------------------|-------------------------------------------------------------------------------------------------------------------|----------------------------------------------------------------------------------------------------------------------------------------------------------------------------------------------------------------------------------------------------------------------------------------------------------------------|-------------------------------------------------|---------------------------------------------------|------|
| Cd MTs                               | Standard solutions of rabbit liver Cd-MTs                   | Capillary electrophoresis                  | Fused-silica uncoated capillaries (75 $\mu\text{m}$ i.d., 363 $\mu\text{m}$ o.d.)                                 | 70 mM TRIS buffer pH 7.4 + 5% methanol                                                                                                                                                                                                                                                                               | Volatile species generation – ICP-quadrupole-MS | Ranging from 119 to 259 ng mL <sup>-1</sup> as Cd | 130  |
| Zn, Cu and Cd MTs isoforms           | Rat liver tissue                                            | Capillary zone electrophoresis             | Uncoated fused silica capillaries (75 $\mu\text{m}$ i.d., 70 and 100 cm long)                                     | (A): 20 mM Tris–HNO <sub>3</sub> , pH 7.4<br>(B): 25 mM ammonium acetate, pH 6.8<br>SEC:<br>30 mM Tris–HCl, pH 7.4<br>AE:<br>30 mM Tris–HCl, pH 7.4                                                                                                                                                                  | ICP-sector-field double-focusing-MS<br>ESI-MS   | 80 $\mu\text{g}$ mL <sup>-1</sup> of MT           | 131  |
| Up to five Zn, Cu and Cd MT isoforms | Cytosolic extracts of carp <i>Carassius auratus gibelio</i> | Size-exclusion HPLC<br>Anion-exchange HPLC | TSK gel G 3000 PWxL (30 cm×7.8 mm id, 6 $\mu\text{m}$ particles)<br>AEC:<br>Protein-Pak DEAE-5PW (7.5mm×75mm id). | (A): 2 mM Tris–HCl, pH 7.4<br>(B): 200 mM Tris–HCl, pH 7.4<br>Gradient: from 0-15% B in 10 min; 15-20% B in 5 min; 20-50% B in 5 min; 50% B for 5 min<br>(A): 1% methanol/30 mM ammonium acetate in, pH 7.4<br>(B): methanol/30 mM ammonium acetate in, pH 7.4<br>Gradient: from 0-30% B in 15 min; 30% B for 10 min | ICP-time-of flight-MS                           | NR                                                | 132  |
| Zn, Pb, Cu and Cd MTs isoforms       | Hepatic cytosols of Cd exposed carp <i>Cyprinus carpio</i>  | Reversed phase HPLC                        | Spherisorb ODS 2 (250 mm×4.6 mm id, 5 $\mu\text{m}$ particles)                                                    | (A): 2 mM Tris–HCl, pH 7.4<br>(B): methanol/30 mM ammonium acetate in, pH 7.4<br>Gradient: from 0-30% B in 15 min; 30% B for 10 min                                                                                                                                                                                  | ICP-time-of flight-MS<br>ESI-time of flight-MS  | NR                                                | 133  |
| Zn and Cu MTs                        | Human peripheral blood mononuclear cells                    | High resolution size exclusion HPLC        | Waters Biosuite 450 8 $\mu\text{m}$ UHR SEC (250 mm×4.6 mm id) + guard UHR SEC (35                                | 0.1 M Tris-HCl + 0.05% NaN <sub>3</sub> , pH 7.2                                                                                                                                                                                                                                                                     | ICP MS                                          | 0.5 ng for total MTs, 0.3 pg for Zn, 0.2 pg       | 134  |

|                                   |                                                                       |                                |                                                                          |                                                                                                                                                                                                                                                                                                                       |                                             |                                                                                                                         |     |
|-----------------------------------|-----------------------------------------------------------------------|--------------------------------|--------------------------------------------------------------------------|-----------------------------------------------------------------------------------------------------------------------------------------------------------------------------------------------------------------------------------------------------------------------------------------------------------------------|---------------------------------------------|-------------------------------------------------------------------------------------------------------------------------|-----|
| MT-3 isoforms                     | Human brain cytosols                                                  | Capillary zone electrophoresis | mm×4.6 mm id<br>Fused silica capillary (length 70 cm, 75 µm id)          | 20 mM Tris, pH 7.4                                                                                                                                                                                                                                                                                                    | ICP-sector field-MS<br>UV                   | for Cu<br>NR                                                                                                            | 35  |
| Zn and Cd MT-1 and MT-2           | Standard solutions of rabbit liver Cd and Zn MT1                      | Capillary zone electrophoresis | Fused-silica uncoated capillaries (length 61-79 cm, 75 µm id, 363 µm od) | 70 mM Tris buffer, pH 7.4 + 5% methanol                                                                                                                                                                                                                                                                               | ICP-quadrupole-MS<br>ICP-double-focusing-MS | Ranging from 15 to 135 ng mL <sup>-1</sup> as Cd                                                                        | 129 |
| Zn, Cu and Cd MTs                 | Cytosolic extracts of bream <i>Abramis brama L.</i>                   | Capillary electrophoresis      | Fused silica capillaries (length 70 cm, id 75 µm).                       | 20 mM Tris-HNO <sub>3</sub> , pH 7.0–7.4                                                                                                                                                                                                                                                                              | ICP-octapole reaction cell-MS               | Ranging from 300 ng L <sup>-1</sup> ( <sup>58</sup> Ni) to 500 ng L <sup>-1</sup> ( <sup>66</sup> Zn, <sup>55</sup> Mn) | 135 |
| Al, Ba, Cu, Fe, Mn, Sr and Zn MTs | Raft mussels ( <i>Mytilus Galloprovincialis</i> ) cytosols            | Anion exchange HPLC            | ProteinPak DEAE-5PW (75 mm×8 mm id)                                      | 75 mM Tris-HCl, pH 7.4                                                                                                                                                                                                                                                                                                | UV<br>ICP-OES                               | 81, 6, 10, 13, 30, 9 and 123 ng g <sup>-1</sup> for Al, Ba, Cu, Fe, Mn, Sr and Zn                                       | 136 |
| Hg, Cd, Cu and Zn MTs             | White-sided dolphin ( <i>Lagenorhynchus acutus</i> ) liver homogenate | Hydrophilic interaction HPLC   | HILIC TSK gel amide 80 (250 mm×1mm id, 5 µm particles)                   | (A): acetonitrile<br>(B): 5 mM ammonium acetate, pH 5.5<br>Gradient: from 0-10% B in 5 min; 10-50% B in 15 min; 50% B for 5 min; 50-65% B in 2 min; 65% B for 3 min<br>(A): 5 mM ammonium acetate pH 6 and eluent<br>(B): 5 mM ammonium acetate (pH 6) in 50% (v/v) acetonitrile.<br>Gradient: from 2-20% B in 50 min | ICP-MS<br>ESI-hybrid linear/orbital trap-MS | NR                                                                                                                      | 137 |
| MTs sub isoforms                  | Kidney pig cell line exposed to CdS nanoparticles                     | Microbore reversed-phase HPLC  | RP C <sub>8</sub> (250 mm×1 mm id, 5 µm particles)                       | (A): 5 mM ammonium acetate pH 6 and eluent<br>(B): 5 mM ammonium acetate (pH 6) in 50% (v/v) acetonitrile.<br>Gradient: from 2-20% B in 50 min                                                                                                                                                                        | ICP-MS<br>ESI-LTQ/Orbitrap-MS               | 100 fmol of protein                                                                                                     | 138 |
| Zn and Cd                         | Mussel cytosolic                                                      | Size exclusion                 | <i>AEC</i> :                                                             | <i>AEC</i> :                                                                                                                                                                                                                                                                                                          | ICP-quadrupole-                             | NR                                                                                                                      | 139 |

|                              |                                                          |                                                    |                                                                                                                                                               |                                                                                                                                                                                                                                                                                                                                                                                                                                                                                                                                                                                                                               |                 |    |     |
|------------------------------|----------------------------------------------------------|----------------------------------------------------|---------------------------------------------------------------------------------------------------------------------------------------------------------------|-------------------------------------------------------------------------------------------------------------------------------------------------------------------------------------------------------------------------------------------------------------------------------------------------------------------------------------------------------------------------------------------------------------------------------------------------------------------------------------------------------------------------------------------------------------------------------------------------------------------------------|-----------------|----|-----|
| MT-1 and<br>MT-2             | extracts                                                 | HPLC<br>Anion exchange<br>HPLC<br>Fast liquid HPLC | Protein Pack DEAE 5PW (75<br>mm×7.5 mm id)<br><i>Fast liquid LC:</i><br>Mono Q HR 5/5 (50 mm×5<br>mm id.)<br><i>SEC:</i><br>Sephadex G-75 (100 cm×1<br>cm id) | (A): 2mM Tris-HCl, pH<br>7.4<br>(B) 200 mM Tris-HCl, pH<br>7.4<br>Gradient: from 0-15% B in<br>10 min; 15-25% B in 5<br>min; 50-100% B in 1 min;<br>100% B for 9 min<br><i>Fast liquid LC:</i><br>(A): 4 mM Tris-HCl, pH<br>7.4<br>(B): 250 mM ammonium<br>acetate +10 mM Tris-HCl,<br>pH 7.4<br>Gradient: from 0-2% B in<br>1.5 min; 2-3% B in 0.5<br>min; 3-4% B in 3.5 min, 4-<br>10% B in 0.5 min; 10-17%<br>B in 4 min; 17-18% B in 1<br>min, 18-100% B in 1 min;<br>100% B for 7 min<br><i>SEC:</i><br>10 mM Tris-HCl, pH 7.4,<br>+ 5mM 2-mercaptoethanol<br>+ 0.1 mM<br>phenylmethylsulphonyl<br>fluoride + 25 mM NaCl | MS              |    |     |
| MT-1 and<br>MT-2<br>isoforms | Rabbit liver<br>cytosol and<br>human cirrhotic<br>livers | Size exclusion<br>HPLC<br>Anion exchange<br>HPLC   | <i>SEC:</i><br>Superdex 75 HR (300<br>mm×10 mm id)<br><i>AEC:</i><br>DEAE column (150 mm×10<br>mm id)<br><i>SEC:</i>                                          | <i>SEC:</i><br>20 mM Tris-buffer, pH 7.4<br><i>AEC:</i><br>from 20 mM to 250 mM<br>Tris-buffer, pH 7.4                                                                                                                                                                                                                                                                                                                                                                                                                                                                                                                        | ICP OES         | NR | 140 |
| Cd, Zn and                   | Cytosolic extracts                                       | Size exclusion                                     | <i>SEC:</i>                                                                                                                                                   | <i>SEC:</i>                                                                                                                                                                                                                                                                                                                                                                                                                                                                                                                                                                                                                   | ICP-quadrupole- | NR | 141 |

|                  |                                                    |                                                |                                                                                                                                                                                                         |                                                                                                                                                                                                                                                                                                                                                                                                                                                                                                                                                                                                                                                                                          |                              |                                             |     |
|------------------|----------------------------------------------------|------------------------------------------------|---------------------------------------------------------------------------------------------------------------------------------------------------------------------------------------------------------|------------------------------------------------------------------------------------------------------------------------------------------------------------------------------------------------------------------------------------------------------------------------------------------------------------------------------------------------------------------------------------------------------------------------------------------------------------------------------------------------------------------------------------------------------------------------------------------------------------------------------------------------------------------------------------------|------------------------------|---------------------------------------------|-----|
| Cu MT-1 and MT-2 | of eels ( <i>Anguilla anguilla</i> ) exposed to Cd | followed by anionic exchange fast protein HPLC | Sephadex G75 (100 cm×1 cm id)<br><i>AEC:</i><br>Mono Q HR 5/5 (5 mm×50 mm id)                                                                                                                           | 10 mM Tris-HCl, pH 7.4, + 5 mM 2-mercaptoethanol + 0.1 mM phenylmethylsulphonyl fluoride + 25 mM NaCl<br><i>AEC:</i><br>(A): 4 mM Tris-HCl buffer, pH 7.4<br>(B): 10 mM Tris-HCl, 0.25 M ammonium acetate buffer, pH 7.4<br>Gradient: from 0-2% B in 1.5 min; 2-3% B in 0.5 min; 3-4% B in 3.5 min; 4-10% B in 0.5 min, 10-17% B in 4 min; 17-18% B in 1 min; 18-80% B in 2 min; 80-90% B in 2 min; 90-100% B in 1 min<br>(A): 20 mM Tris-HCl, pH 7.4<br>(B): 200 mM Tris-HCl, pH 7.4<br>Gradient: from 0-60% B in 18 min<br><i>Gel filtration LC:</i><br>25 mM Tris-HCl, pH 7.2<br><i>AEC:</i><br>(A): 2 mM 1,3-propanediamine HCl, pH 9.0<br>(B) 100 mM 1,3-propanediamine HCl, pH 9.0 | MS<br>ICP-double focusing-MS |                                             |     |
| Cd MTs           | Cd-treated and untreated rat livers                | Anion exchange HPLC                            | Fractogel EMD DEAE-650 (S) (70 mm×10 mm id, 20–40 µm particles)<br><br><i>Gel filtration LC:</i><br>Shodex Protein KW802.5-M8E (250 mm×0.8 mm id)<br><i>AEC:</i><br>Shodex DEAE9A-M8B (50 mm×0.8 mm id) | 25 mM Tris-HCl, pH 7.2<br><i>AEC:</i><br>(A): 2 mM 1,3-propanediamine HCl, pH 9.0<br>(B) 100 mM 1,3-propanediamine HCl, pH 9.0                                                                                                                                                                                                                                                                                                                                                                                                                                                                                                                                                           | Flame AAS                    | 2.0 µg MT-1/g liver and 1.3 µg MT-2/g liver | 142 |
| MTs isoforms     | Mouse hepa cells                                   | 2-D gel filtration and anion exchange HPLC     |                                                                                                                                                                                                         |                                                                                                                                                                                                                                                                                                                                                                                                                                                                                                                                                                                                                                                                                          | ICP-MS                       | NR                                          | 143 |



|                            |                                                              |                                |                                                                                                                                                             |                                                                                                                                                                    |                                       |                                    |     |
|----------------------------|--------------------------------------------------------------|--------------------------------|-------------------------------------------------------------------------------------------------------------------------------------------------------------|--------------------------------------------------------------------------------------------------------------------------------------------------------------------|---------------------------------------|------------------------------------|-----|
| MTs isoforms               | Alzheimer's disease and control brains                       | Size exclusion HPLC            | Superdex 75 PG (600 mm×16 mm id)                                                                                                                            | 20 mM Tris-buffer, pH 7.4                                                                                                                                          | UV ICP-MS                             | NR                                 | 144 |
| Cd MTs                     | Cytosolic extracts of eels ( <i>Anguilla anguilla</i> )      | Vesicle mediated HPLC          | Spherisorb C <sub>18</sub> <b>bounded</b> silica stationary phase (250 mm×4.6 mm id, 5 μm particles) modified with didodecyldimethylammonium bromide (DDAB) | (A): 2 mM Tris-HCl + 100 mM DDAB, pH 7.4<br>(B): 200 mM Tris-HCl + 100 mM DDAB, pH 7.4<br>Gradient: from 0-50% B in 20 min; 50-100% B in 3 min; 100-99% B in 8 min | Hydride generation-ICP MS             | Ranging from 8.8 and 17.1 pg as Cd | 145 |
| Zn, Cu and Cd MTs isoforms | Preparation of rabbit-liver MT<br>Purified rabbit-liver MT-1 | Capillary electrophoresis      | Fused silica capillary (70 cm length, 75 μm id)                                                                                                             | 20 mM Tris, pH 7.4                                                                                                                                                 | ICP-sector field-MS                   | 72.6 μg mL <sup>-1</sup> for MT-1  | 121 |
| MT-1 and MT-2 isoforms     | Rabbit liver MT-1, MT-2 and MT preparations                  | Capillary zone electrophoresis | Uncoated fused silica capillaries (70-100 cm length, 75 μm id)                                                                                              | 5 mM acetate buffer, pH 6 (ICP-MS detection)<br>10 mM acetate buffer, pH 6 (ESI-MS detection)                                                                      | UV ICP-MS<br>ESI-triple quadrupole-MS | NR                                 | 146 |

**Table 5.** Analytical methods for the species-selective analysis of proteins tagged with mercury by hyphenated techniques with element-selective detection.

| Sample type                                        | Labeling tag                                                                                                                                                                                                                 | Separation technique                       | Column                                                                                                                                                            | Eluent                                                                                                                                                                                                                                                                                                                                                             | Detector                                                                                                    | Detection limits                                                                                                                   | Ref. |
|----------------------------------------------------|------------------------------------------------------------------------------------------------------------------------------------------------------------------------------------------------------------------------------|--------------------------------------------|-------------------------------------------------------------------------------------------------------------------------------------------------------------------|--------------------------------------------------------------------------------------------------------------------------------------------------------------------------------------------------------------------------------------------------------------------------------------------------------------------------------------------------------------------|-------------------------------------------------------------------------------------------------------------|------------------------------------------------------------------------------------------------------------------------------------|------|
| Ovalbumin<br>$\beta$ -lactoglobulin                | <ul style="list-style-type: none"> <li>• <math>\text{CH}_3\text{Hg}^+</math></li> <li>• <math>\text{CH}_3\text{CH}_2\text{Hg}^+</math></li> <li>• <i>p</i>HMB</li> <li>• 2,7-dibromo-4-hydroxymercuri fluorescein</li> </ul> | Size exclusion HPLC<br>Reversed phase HPLC | VP-ODS $\text{C}_{18}$ (250 mm $\times$ 2.0 mm id, 5 $\mu\text{m}$ particles)<br>ZORBAX Bio Series GF-250 (250 $\times$ 4.6 mm id, 4-4.5 $\mu\text{m}$ particles) | NR<br><br><i>RPC:</i><br>(A): water/0.05% trifluoroacetic acid<br>(B): acetonitrile/0.05% trifluoroacetic acid<br>Gradient: from 30-90%<br>B<br><i>SEC:</i><br>5 mM Tris + 100 mM ammonium bicarbonate, pH 7.35<br>(A): 2% acetonitrile/98% water/0.05% trifluoroacetic acid<br>(B): 98% acetonitrile/2% water/0.05% trifluoroacetic acid<br>Gradient: from 20-80% | ICP-dynamic reaction cell-quadrupole-MS<br>ESI-ion trap-MS<br>MALDI-time of flight-MS<br>UV<br>Fluorescence | NR                                                                                                                                 | 190  |
| Glutathione<br>Ovalbumin<br>$\beta$ -lactoglobulin | <ul style="list-style-type: none"> <li>• <math>\text{CH}_3\text{Hg}</math>-thiosalicylate</li> <li>• <math>\text{CH}_3^{204}\text{Hg}</math>-thiosalicylate</li> </ul>                                                       | Reversed phase HPLC<br>Size exclusion HPLC | <i>RPC:</i><br>VP-ODS C18 (250 mm $\times$ 2.0 mm id)<br><i>SEC:</i><br>Superdex 75 10/300 GL (300 mm $\times$ 10 mm id, 13 $\mu\text{m}$ particles)              | B<br>SEC: 5 mM Tris + 100 mM ammonium bicarbonate, pH 7.35<br>(A): 2% acetonitrile/98% water/0.05% trifluoroacetic acid<br>(B): 98% acetonitrile/2% water/0.05% trifluoroacetic acid<br>Gradient: from 20-80%                                                                                                                                                      | ICP-MS<br>UV<br>ESI-ion trap-MS<br>ESI-time of flight-MS                                                    | 45.4 pmol L <sup>-1</sup> (Glutathione)<br>15.1 pmol L <sup>-1</sup> (Ovalbumin)<br>45.4 pmol L <sup>-1</sup> (Beta lactoglobulin) | 169  |
| Ovalbumin                                          | <i>p</i> HMB                                                                                                                                                                                                                 | Reversed phase $\mu$ HPLC                  | Diphenyl (150 mm $\times$ 300 $\mu\text{m}$ id. 5 $\mu\text{m}$ particles, 300 $\text{\AA}$ )                                                                     | (A): 2% acetonitrile/98% water/0.05% trifluoroacetic acid<br>(B): 98% acetonitrile/2% water/0.05% trifluoroacetic acid<br>Gradient: from 20-80%                                                                                                                                                                                                                    | ICP-MS<br>MALDI-time of flight-MS<br>ESI-time of flight-MS                                                  | 1 fmol abs. for Ovalbumin                                                                                                          | 191  |

|                                                                                                                                                |                                                                                                                                                               |                                 |                                                                                     |                                                                                                                                                                                                                                                                                                                                                                                          |                                                                  |                                                                               |     |
|------------------------------------------------------------------------------------------------------------------------------------------------|---------------------------------------------------------------------------------------------------------------------------------------------------------------|---------------------------------|-------------------------------------------------------------------------------------|------------------------------------------------------------------------------------------------------------------------------------------------------------------------------------------------------------------------------------------------------------------------------------------------------------------------------------------------------------------------------------------|------------------------------------------------------------------|-------------------------------------------------------------------------------|-----|
| Insulin                                                                                                                                        | <i>p</i> HMB                                                                                                                                                  | Reversed phase<br>$\mu$ HPLC    | Diphenyl (150 mm $\times$ 300<br>$\mu$ m id, 5 $\mu$ m particles,<br>300 Å)         | B<br>(A): 2%<br>acetonitrile/98%<br>water/0.05%<br>trifluoroacetic acid<br>(B): 98%<br>acetonitrile/2%<br>water/0.05%<br>trifluoroacetic acid<br>Gradient from 0-80% B<br>(A): water/0.3% acetic<br>acid<br>(B): acetonitrile/0.3%<br>acetic acid<br>Gradient: from 10-45%<br>B<br>(A): water/0.3% acetic<br>acid<br>(B): acetonitrile/0.3%<br>acetic acid<br>Gradient: from 10-60%<br>B | ICP-MS<br>MALDI-time of<br>flight-MS<br>ESI-time of<br>flight-MS | subfemtomole                                                                  | 170 |
| Bovine pancreatic<br>ribonuclease A<br>Lysozyme<br>Insulin                                                                                     | CH <sub>3</sub> Hg <sup>+</sup>                                                                                                                               | Reversed phase<br>HPLC          | Zorbax 300SB-C <sub>18</sub> (150<br>mm $\times$ 1 mm id, 3.5 $\mu$ m<br>particles) | B<br>(A): water/0.3% acetic<br>acid<br>(B): acetonitrile/0.3%<br>acetic acid<br>Gradient: from 10-45%<br>B<br>(A): water/0.3% acetic<br>acid<br>(B): acetonitrile/0.3%<br>acetic acid<br>Gradient: from 10-60%<br>B                                                                                                                                                                      | ICP-dynamic<br>reaction cell-MS<br>ESI-ion trap-MS               | 0.6 pmol<br>(ribonuclease)<br>1.2 pmol<br>(lysozyme)<br>0.4 pmol<br>(insulin) | 192 |
| Glutathione<br>Phytochelatins,<br>Lysozyme<br>$\beta$ -lactoglobulin                                                                           | <ul style="list-style-type: none"> <li>• CH<sub>3</sub>Hg<sup>+</sup></li> <li>• CH<sub>3</sub>CH<sub>2</sub>Hg<sup>+</sup></li> <li>• <i>p</i>HMB</li> </ul> | Reversed phase<br>HPLC          | Zorbax C <sub>18</sub> (150 mm $\times$ 1<br>mm id, 3.5 $\mu$ m<br>particles)       | B<br>(A): water/0.3% acetic<br>acid<br>(B): acetonitrile/0.3%<br>acetic acid<br>Gradient: from 10-60%<br>B                                                                                                                                                                                                                                                                               | ESI-ion trap-MS                                                  | NR                                                                            | 19  |
| Glyceraldehyde-<br>3-phosphate<br>dehydrogenase<br>Aldolase<br>Pyruvate kinase<br>Triose phosphate<br>isomerase<br>Phosphoglucose<br>isomerase | <i>p</i> HMB                                                                                                                                                  | Hydrophobic<br>interaction HPLC | TSK-Gel1 Ether-5PW<br>(750 mm $\times$ 7.5 mm id)                                   | (A): 0.05 M phosphate<br>buffer + 1.8 M sodium<br>sulphate, pH 7.2<br>(B): 0.05 M phosphate<br>buffer, pH 7.2<br>Gradient: from 0-100%<br>B in 20 min                                                                                                                                                                                                                                    | CVG-AFS                                                          | 10 <sup>-8</sup> – 10 <sup>-9</sup><br>mol L <sup>-1</sup>                    | 161 |
| MTs from rabbit<br>liver                                                                                                                       | <i>p</i> HMB                                                                                                                                                  | Reversed phase<br>HPLC          | RP C <sub>4</sub> (150 mm $\times$ 4.6<br>mm id, 5 $\mu$ m particles,<br>300 Å)     | (A): 95% water/0.1%<br>trifluoroacetic acid/5%<br>methanol                                                                                                                                                                                                                                                                                                                               | CVG-AFS                                                          | 0.86 nmol L <sup>-1</sup><br>for<br>denaturated                               | 162 |

|                                                                                                                                                                |              |                                                  |                                                                                                                                                                  |                                                                                                                                                                                                                                                                                                                                                                                                                                                                                                     |                                             |                                                   |     |
|----------------------------------------------------------------------------------------------------------------------------------------------------------------|--------------|--------------------------------------------------|------------------------------------------------------------------------------------------------------------------------------------------------------------------|-----------------------------------------------------------------------------------------------------------------------------------------------------------------------------------------------------------------------------------------------------------------------------------------------------------------------------------------------------------------------------------------------------------------------------------------------------------------------------------------------------|---------------------------------------------|---------------------------------------------------|-----|
| Phytochelatin<br>Extracts of cell<br>cultures from<br><i>Phaeodactylum</i><br><i>tricornutum</i>                                                               | <i>p</i> HMB | Size exclusion<br>HPLC<br>Reversed phase<br>HPLC | <i>SEC</i> :<br>BioSep-SEC-S 2000<br>(300 mm×7.8 mm, 5<br>µm particles)<br><i>RPC</i> :<br>Ultrasphere ODS C <sub>18</sub><br>(250 mm×4.6 mm, 5<br>µm particles) | (B): 95% methanol/<br>0.1% trifluoroacetic<br>acid/5% water<br>Gradient: from 0-50%<br>B in 25 min<br><i>SEC</i> :<br>0.1 M phosphate buffer,<br>pH 6.77<br><i>RPC</i> :<br>(A): water/0.1%<br>trifluoroacetic acid<br>(B): 5% A + 95%<br>methanol<br>Gradient: from 10-45%<br>B in 30 min, 45-80% B<br>in 25 min<br>(A): 90% water/ 0.01%<br>trifluoroacetic acid/10%<br>methanol<br>(B): methanol<br>Gradient: from 0-30%<br>B in 15 min<br>99% 0.02 M phosphate<br>buffer pH 6.0, 1%<br>methanol | UV<br>CVG-AFS<br>MALDI-time of<br>flight-MS | MTs<br><br>0.97 ng of<br>glutathione              | 193 |
| Cysteine<br>Glutathione<br>Homocysteine<br>Cysteinyl-glycine                                                                                                   | <i>p</i> HMB | Reversed phase<br>HPLC                           | RP C <sub>12</sub> (150 mm×4.6<br>mm id, 4 µm particles).                                                                                                        | (A): water/0.1%<br>trifluoroacetic acid/40%<br>methanol<br>(B): methanol/0.1%<br>trifluoroacetic acid/10%<br>water<br>Gradient: from 0-100%<br>B in 43 min                                                                                                                                                                                                                                                                                                                                          | CVG-AFS                                     | 45 nmol L <sup>-1</sup><br>for all the<br>species | 182 |
| S-<br>nitroglutathione<br>in human blood<br>Human serum<br>albumin<br>Bovine serum<br>albumin<br>Rat serum<br>albumin<br>Horse serum<br>albumin<br>Sheep serum | <i>p</i> HMB | Reversed phase<br>HPLC                           | Hydra RP C <sub>18</sub> (250<br>mm×4.6 mm, 4 µm<br>particles)                                                                                                   |                                                                                                                                                                                                                                                                                                                                                                                                                                                                                                     | CVG-AFS                                     | 25 nmol L <sup>-1</sup>                           | 166 |
|                                                                                                                                                                | <i>p</i> HMB | Reversed phase<br>HPLC                           | RP C <sub>4</sub> (150 mm×4.6<br>mm id, 5 µm particles,<br>300 Å)                                                                                                |                                                                                                                                                                                                                                                                                                                                                                                                                                                                                                     | CVG-AFS                                     | 57 nmol L <sup>-1</sup><br>for <i>p</i> HMB       | 194 |

---

albumin  
Ovalbumin  
 $\beta$ -lactoglobulin

---

**Table 6.** Analytical methods for the species-selective analysis of proteins tagged with iodine and ferrocene by hyphenated techniques with element-selective detection.

| Sample type                                                                                                      | Labeling tag                               | Separation technique                | Column                                                                     | Eluent                                                                                                                                                                                                                                                                                                                                                                                                                                                                                                                                                                                                                                                                                                                                                                                                                         | Detector                                                            | Detection limits                                   | Ref. |
|------------------------------------------------------------------------------------------------------------------|--------------------------------------------|-------------------------------------|----------------------------------------------------------------------------|--------------------------------------------------------------------------------------------------------------------------------------------------------------------------------------------------------------------------------------------------------------------------------------------------------------------------------------------------------------------------------------------------------------------------------------------------------------------------------------------------------------------------------------------------------------------------------------------------------------------------------------------------------------------------------------------------------------------------------------------------------------------------------------------------------------------------------|---------------------------------------------------------------------|----------------------------------------------------|------|
| Tyrosine<br>Three peptides<br>from reference<br>material (NIST<br>8327)<br>Tryptic digests of<br>$\beta$ -casein | Bis(pyridine)iodonium<br>tetrafluoroborate | Reversed<br>phase capillary<br>HPLC | Zorbax SB C <sub>18</sub> (150<br>mm×0.3 mm, 5 $\mu$ m<br>particles, 80 Å) | (A): water/0.1% formic acid/50<br>ng Ge mL <sup>-1</sup><br>(B): acetonitrile/0.1% formic<br>acid/50 ng Ge mL <sup>-1</sup><br>Gradient for tyrosine: 3% B for<br>6.5 min, 3-80% B in 23 min,<br>80% B for 2 min<br>Gradient for peptides: 5% B for<br>6.5 min, 3-80% B in 23 min,<br>80% B for 2 min<br>Gradient for tryptic digests of $\beta$ -<br>casein: 5% B for 6.5 min, 5-<br>20% B in 7 min,<br>20-40% B in 49.5 min, 40-80%<br>B in 5 min,<br>80-95% B in 2 min, 95% B for 1<br>min<br>Rehydration buffer: 0.3 M<br>Tris/acetate, 0.1% SDS, 0.01%<br>sodium azide, pH 8.0<br>Anode buffer: 0.3 M<br>Tris/acetate, 0.1% SDS, 0.01%<br>sodium azide, pH 8.4<br>Cathode buffer: 0.8 M<br>Ntris(hydroxymethyl)methylgly<br>cine, 0.08 M Tris, 0.1% SDS,<br>0.01% sodium azide, pH 7.15)<br>Sample buffer 1 mL 0.5 M Tris | ICP-collision<br>cell-MS<br>ESI-<br>quadrupole/time<br>of flight-MS | 480 pmol L <sup>-1</sup> ,<br>480 amol<br>absolute | 196  |
| Cytochromes<br>P450                                                                                              | Monoclonal antibody<br>labeled with iodine | SDS-PAGE<br>Semidry<br>immunoblot   | -                                                                          |                                                                                                                                                                                                                                                                                                                                                                                                                                                                                                                                                                                                                                                                                                                                                                                                                                | LA-ICP-MS                                                           | 70 fmol for<br>CYP2E1                              | 218  |

| Sample type                                                         | Labeling tag                                                                                                                                                                            | Separation technique                                                    | Column                                                                                                                    | Eluent                                                                                                                                                                                                                                                                                               | Detector                                                                           | Detection limits                  | Ref. |
|---------------------------------------------------------------------|-----------------------------------------------------------------------------------------------------------------------------------------------------------------------------------------|-------------------------------------------------------------------------|---------------------------------------------------------------------------------------------------------------------------|------------------------------------------------------------------------------------------------------------------------------------------------------------------------------------------------------------------------------------------------------------------------------------------------------|------------------------------------------------------------------------------------|-----------------------------------|------|
| Lysozyme<br>Bovine serum albumin<br>Cytochrome c<br>$\beta$ -casein | Potassium triiodide<br>IODO-Beads                                                                                                                                                       | SDS-PAGE<br>Semidry blotting<br>Western blotting<br>Reversed phase HPLC | ZIC-HILIC microbore (150 mm $\times$ 1 mm id, 3.5 $\mu$ m particles) + guard (5 mm $\times$ 1 mm id, 5 $\mu$ m particles) | pH 7.5, 0.1 g SDS, 15.5 mg DTT, made upto 10 mL with water<br>RPC:<br>(A): 5% water/95% acetonitrile + 10 mM ammonium acetate/ acetic acid, pH 4.8<br>(B): 5% acetonitrile/95% water + 10 mM ammonium acetate/ acetic acid, pH 4.8<br>Gradient: 10% B for 2 min, 10-80% B in 36 min, 80% B for 7 min | LA-ICP-sector field-MS<br>ESI-linear triple quadrupole/<br>Fourier transform- MS   | low pmol/upper fmol-range         | 205  |
| Porcine gastric mucosa pepsin<br>Lysozyme<br>Bovine serum albumin   | Sodium iodide                                                                                                                                                                           | SDS-PAGE<br>Semidry blotting                                            | -                                                                                                                         | Sample buffer solution: 8 mL of water + 2 mL of 0.5 M Tris (pH 6.8), 1.6 mL of 80% glycerol + 3.2 mL of 10% (w/v) SDS and 23.4 mg of 1,4-dithio-DL-threitol.                                                                                                                                         | LA-ICP-sector field-MS<br>nanoESI-<br>Fourier transform ion cyclotron resonance-MS | 150 fmol for bovine serum albumin | 198  |
| Lysozyme<br>$\beta$ -lactoglobulin A<br>Insulin                     | <ul style="list-style-type: none"> <li>Succinimidylferrocenyl propionate (for amino groups)</li> <li>Ferrocenecarboxylic acid(2-maleimidoyl)ethyl amide (for thiolic groups)</li> </ul> | Reversed phase HPLC                                                     | BioWidePore C <sub>5</sub> (150 mm $\times$ 2.1 mm id, 5 $\mu$ m particles)                                               | (A): water/0.1% formic acid<br>(B): acetonitrile<br>Gradient A: 10% B for 1 min, 10-100%B in 4 min, 100% B for 1 min<br>Gradient B: 10% B for 1 min, 10-100%B in 14 min, 100% B for 2 min                                                                                                            | ICP-octapole reaction cell-MS<br>ESI-<br>quadrupole/ion trap-MS                    | NR                                | 212  |
| Haemoglobin A <sub>1c</sub>                                         | Ferrocene-conjugated anti-human haemoglobin monoclonal antibody                                                                                                                         | On-chip type cation-exchange chromatograph                              | On-chip type column (depth: 1mm; width: 1mm; length: 30mm) in                                                             | (A): 20mM sodium acetate, pH 5.5<br>(B): 200mM NaCl, pH 5.5<br>Gradient from 0-100% B in 30                                                                                                                                                                                                          | Electrochemical detector                                                           | NR                                | 217  |

| Sample type                                     | Labeling tag                  | Separation technique            | Column                                                                                                                                                                                                                                                                                                                                                                                                                                  | Eluent                                                                                                                                                                                                                                                                                                                               | Detector                                                  | Detection limits | Ref. |
|-------------------------------------------------|-------------------------------|---------------------------------|-----------------------------------------------------------------------------------------------------------------------------------------------------------------------------------------------------------------------------------------------------------------------------------------------------------------------------------------------------------------------------------------------------------------------------------------|--------------------------------------------------------------------------------------------------------------------------------------------------------------------------------------------------------------------------------------------------------------------------------------------------------------------------------------|-----------------------------------------------------------|------------------|------|
|                                                 |                               | y<br>Cation<br>exchange<br>HPLC | polymethylmethacrylate, packed with cation-exchange beads (particle diameter: 30 $\mu$ m)<br><i>CEC:</i><br>Tricon column (20 x 5mm) filled with 700 $\mu$ L of cation-exchange resin beads (SOURCE 30S; spherical and porous bead (30 $\mu$ m diameter); matrix polystyrene/divinyl benzene; type of ion exchanger: R-O-CH <sub>2</sub> -CHOH-CH <sub>2</sub> -O-CH <sub>2</sub> -CHOH-CH <sub>2</sub> -SO <sub>3</sub> <sup>-</sup> ) | min                                                                                                                                                                                                                                                                                                                                  |                                                           |                  |      |
| Lysozyme<br>$\beta$ -lactoglobulin A<br>Insulin | N-(2-Ferroceneethyl)maleimide | Reversed phase HPLC             | Discovery BioWidePore C5-5 (150 mm $\times$ 2.1 mm id, 5 $\mu$ m particles)                                                                                                                                                                                                                                                                                                                                                             | (A): 0.1% formic acid in water/0.1% formic acid in acetonitrile<br>(B): 10 mM NH <sub>4</sub> HCO <sub>3</sub> buffer and acetonitrile<br>Gradient A: from 10-100% acetonitrile in 20 min<br>Gradient B: from 10-100% acetonitrile in 25 min<br>Gradient C: from 5-60% acetonitrile in 5 min, 60-75% acetonitrile in 15 min, 75-100% | Cyclic voltammetry hyphenated with a single-quadrupole-MS | NR               | 219  |



| Sample type                                                                                                                | Labeling tag                                                                                    | Separation technique | Column                                                             | Eluent                                                                                                                                                                                                                                                                                    | Detector                                                                            | Detection limits                                                                                                                       | Ref. |
|----------------------------------------------------------------------------------------------------------------------------|-------------------------------------------------------------------------------------------------|----------------------|--------------------------------------------------------------------|-------------------------------------------------------------------------------------------------------------------------------------------------------------------------------------------------------------------------------------------------------------------------------------------|-------------------------------------------------------------------------------------|----------------------------------------------------------------------------------------------------------------------------------------|------|
| <p><math>\alpha</math>-lactalbumin</p> <p><math>\beta</math>-lactoglobulin B</p> <p><math>\beta</math>-lactoglobulin A</p> | <p>N-(2-ferrocene-ethyl)maleimide</p> <p>Ferrocenecarboxylic acid-(2-maleimidoyl)ethylamide</p> | Reversed phase HPLC  | Discovery BioWidePore C5-5 (150 mm×2.1 mm id, 5 $\mu$ m particles) | <p>acetonitrile in 2 min</p> <p>(A): 10 mM ammonium formate, pH 4</p> <p>(B): acetonitrile</p> <p>Gradient A: 5-33% B in 5 min, 33-40% B in 20 min, 40-90% B in 3 min</p> <p>Gradient B: 30-40% B in 5 min, 40-50%B in 20 min, 50-90% B in 3 min</p> <p>Gradient C: 5-90% B in 20 min</p> | Cyclic voltammetry hyphenated with ESI-quadrupole/ion trap-MS                       | NR                                                                                                                                     | 207  |
| Phytochelatins from algae extracts                                                                                         | Ferrocenecarboxylic acid (2-maleimidoyl)ethylamide                                              | Reversed phase HPLC  | Discovery C8 (150 mm×2.1 mm id, 5 $\mu$ m particles, 180 Å)        | <p>(A): 0.1% formic acid/water</p> <p>(B): acetonitrile</p> <p>Gradient: 5% B, 5-90% B in 60 min, 90% B for 3 min</p>                                                                                                                                                                     | <p>ESI-time of flight-MS</p> <p>ESI-Triple quadrupole/ion trap-MS</p> <p>ICP-MS</p> | <p>0.69 <math>\mu</math>mol L<sup>-1</sup> for CysPC<sub>2</sub></p> <p>0.59 <math>\mu</math>mol L<sup>-1</sup> for PC<sub>2</sub></p> | 216  |

**Table 7.** Analytical methods for the species-selective analysis of proteins tagged with MeCAT by hyphenated techniques with element-selective detection.

| Sample type                                                                  | Labeling tag                                                                                                       | Separation technique                                    | Column                                                                                                                                | Eluent                                                                                                                                                                                                                       | Detector                                                                                                     | Detection limits                                                                                                       | Ref. |
|------------------------------------------------------------------------------|--------------------------------------------------------------------------------------------------------------------|---------------------------------------------------------|---------------------------------------------------------------------------------------------------------------------------------------|------------------------------------------------------------------------------------------------------------------------------------------------------------------------------------------------------------------------------|--------------------------------------------------------------------------------------------------------------|------------------------------------------------------------------------------------------------------------------------|------|
| Vasopressin<br>GGYGGC<br>Somatostatin                                        | <ul style="list-style-type: none"> <li>MMA-DOTA loaded with Eu(III)</li> <li>Fluorescein isothiocyanate</li> </ul> | Reversed phase HPLC<br>Capillary electrophoresis        | Zorbax 300SB-C <sub>18</sub> column (150 mm × 1 mm id, 3.5 μm particles)<br>Uncoated fused-silica capillary (40 cm length, 75 μm id)  | <i>RPC:</i><br>(A): water/0.05% trifluoroacetic acid<br>(B): acetonitrile/0.05% trifluoroacetic acid<br>Gradient: from 25-60% B in 30 min<br><i>CE:</i><br>Running buffer 200 mM sodium carbonate-sodium bicarbonate, pH 9.5 | UV<br>ESI-ion trap-MS<br>ICP-MS<br>CE-LIF                                                                    | 0.130 nmol L <sup>-1</sup> Vasopressin<br>0.130 nmol L <sup>-1</sup> Somatostatin<br>0.259 nmol L <sup>-1</sup> GGYGGC | 235  |
| <i>Sus scrofa</i> eye lens proteins<br>α-lactalbumin<br>Bovine serum albumin | DOTA loaded with Lu(III), Ho(III), Tb(III), Tm(III)                                                                | 1-D SDS-PAGE<br>2-D SDS-PAGE<br>Reversed phase nanoHPCL | Zorbax 300SB-C <sub>18</sub> (150 mm×75 μm id, 3.5 μm particles) + guard Zorbax 300SB-C <sub>18</sub> (0.3 mm×5 mm, 3.5 μm particles) | <i>RPC:</i><br>(A): 98.5% water/1% acetonitrile/0.5% formic acid<br>(B): 94.9% water/5% acetonitrile/0.1% formic acid<br>(C): 99.9% acetonitrile/0.1% formic acid                                                            | ICP-quadrupole-MS<br>ICP-high resolution sector field-MS<br>MALDI-time of flight-MS<br>ESI-time of flight-MS | 110 amol bovine serum albumin<br>670 amol alpha lactalbumin                                                            | 225  |
| Insulin<br>Insulin chain A<br>Insulin chain B                                | DTPA loaded with Lu(III)                                                                                           | Reversed phase nanoHPCL                                 | Acclaim PepMap100 C <sub>18</sub> (15 cm×75 μm id, 3 μm particles, 100 Å)                                                             | (A): 10 mM triethylammonium bicarbonate, pH 7.5<br>(B): 90% acetonitrile + 10% 100 mM triethylammonium                                                                                                                       | ICP-MS<br>ESI-quadrupole/time of flight-MS                                                                   | 179 amol for tagged proteins                                                                                           | 229  |

|                                       |                                                          |                        |                                                                                           |                                                                                                                                                                                                                                                                                                                                                                                                                                                                                                                                                                                           |                             |                                 |     |
|---------------------------------------|----------------------------------------------------------|------------------------|-------------------------------------------------------------------------------------------|-------------------------------------------------------------------------------------------------------------------------------------------------------------------------------------------------------------------------------------------------------------------------------------------------------------------------------------------------------------------------------------------------------------------------------------------------------------------------------------------------------------------------------------------------------------------------------------------|-----------------------------|---------------------------------|-----|
| Lysozyme<br>Bovine serum<br>albumin   | MeCAT-Eu<br>(Proteome Factory<br>AG, Berlin,<br>Germany) | Reversed phase<br>HPCL | RP-C <sub>18</sub> column<br>(Polaris 3 C18-Ether,<br>150 mm×1 mm id, 5<br>µm particles). | bicarbonate, pH 7.5<br>Gradient for standard<br>peptides: 5-100% B in 15<br>min<br>Gradient for tryptic<br>digests:<br>5% B for 5 min, 5-62% B<br>in 10 min, 62-100% B in<br>2 min, 100% B for 5 min<br>(A): water/1%<br>ACN/0.1% formic acid<br>(B): 90% ACN/0.1%<br>formic acid/10% water<br>Gradient A: from 5-15%<br>B in 1 min, 15-20% B in<br>2 min, 20-23% B in 35<br>min, 23-50% B in 3 min<br>Gradient B: from 15-18%<br>B in 10 min, 18-25% B<br>in 60 min, 25-40% B in 2<br>min<br>(A): water/0.05%<br>trifluoroacetic acid<br>(B): acetonitrile/0.05%<br>trifluoroacetic acid | ICP-MS                      | 1.6 fmol for<br>tagged proteins | 7   |
| Lysozyme<br>Insulin<br>Ribonuclease A | MMA-DOTA<br>loaded with Eu(III)                          | Reversed phase<br>HPCL | Zorbax 300SB C <sub>18</sub><br>(150 mm×1 mm id;<br>3.5 µm particles).                    | Gradient A: from 20-<br>70% B in 13 min<br>Gradient B: from 20-60%<br>B in 30 min<br>Gradient C: from 5-60%<br>C in 55 min)<br>(A): water/0.05% formic<br>acid<br>(B): acetonitrile/0.05%                                                                                                                                                                                                                                                                                                                                                                                                 | ICP-MS<br>ESI-ion trap-MS   | 0.819 fmol for<br>lysozyme      | 224 |
| Bradykinin<br>Substance P             | DTPA loaded with<br>Eu(III)                              | Reversed phase<br>HPCL | Luna C18(2)                                                                               | (A): water/0.05% formic<br>acid<br>(B): acetonitrile/0.05%                                                                                                                                                                                                                                                                                                                                                                                                                                                                                                                                | ICP-quadrupole-<br>MS<br>UV | 1.0 × 10 <sup>7</sup> fmol      | 241 |

|                                                   |                                               |                                           |                                                                                                                                                        |                                                                                                                                                                                                                                                                                  |                                                                        |          |     |
|---------------------------------------------------|-----------------------------------------------|-------------------------------------------|--------------------------------------------------------------------------------------------------------------------------------------------------------|----------------------------------------------------------------------------------------------------------------------------------------------------------------------------------------------------------------------------------------------------------------------------------|------------------------------------------------------------------------|----------|-----|
| B $\beta$ <sub>15-42</sub>                        | DOTA loaded with In(III)                      | Reversed phase HPCL                       | Nucleosil C <sub>8</sub> (150mm×1 mm, 5 $\mu$ m particles; 100 Å)                                                                                      | formic acid<br>Gradient A: from 0-33% B in 20 min<br>Gradient B: from 0-15% B in 5 min, 15-18.75% B in 15 min<br>(A): water/0.1 % formic acid/1% methanol<br>(B): methanol/0.1 % formic acid/1 water<br>Gradient: 10% B for 4 min, 10-100%B in 1 min, 100% B for 5 min           | ESI-MS/MS<br><br>ICP-dynamic reaction cell-MS<br>ESI-time of flight-MS | 1.7 fmol | 240 |
| Bovine serum albumin<br>Lysozyme                  | DOTA loaded with lanthanides                  | SDS-PAGE<br>Semidry blotting              | -                                                                                                                                                      | -                                                                                                                                                                                                                                                                                | LA-ICP-MS<br>nanoESI-ion cyclotron resonance Fourier transform -MS     | 15 fmol  | 204 |
| Bradykinin                                        | DOTA-NHS-ester loaded with Eu(III)            | Reversed phase HPLC<br>Gas chromatography | ZORBAX Eclipse Plus C <sub>18</sub> (150 mm×2.1 mm, 5 $\mu$ m particles)<br>DB-5MS (30 m×0.25 $\mu$ m)                                                 | <i>RPC:</i><br>(A): water<br>(B): acetonitrile<br>Gradient: 95% A for 5 minutes; from 5-40% B 35 min<br><i>GC:</i><br>Carrier gas helium<br>(A): 94.9% water/5% acetonitrile/0.1% formic acid<br>(B): 99.9% acetonitrile/0.1% formic acid<br>Gradient A: from 0-100% B in 45 min | ICP-quadrupole-MS<br>ESI-ion trap-MS<br>MS<br>GC-MS                    | 7.2 fmol | 242 |
| Aprotinin:: $\beta$ -galactosidase fusion protein | MeCAT reagent loaded with Ho(III) and Lu(III) | 2-D SDS-PAGE<br>Reversed phase nanoHPLC   | Zorbax 300 SB-C <sub>18</sub> (150 mm×75 $\mu$ m id, 3.5 $\mu$ m particles) + guard Zorbax 300 SB-C <sub>18</sub> (0.3 mm×5 mm, 3.5 $\mu$ m particles) |                                                                                                                                                                                                                                                                                  | ICP-MS<br>ESI-quadrupole/time of flight-MS                             | NR       | 243 |

|                                                                                                |                                                              |                         |                                                                                                                                                                                                         |                                                                                                                                                                                                                                                                                                               |                                                                             |                                     |     |
|------------------------------------------------------------------------------------------------|--------------------------------------------------------------|-------------------------|---------------------------------------------------------------------------------------------------------------------------------------------------------------------------------------------------------|---------------------------------------------------------------------------------------------------------------------------------------------------------------------------------------------------------------------------------------------------------------------------------------------------------------|-----------------------------------------------------------------------------|-------------------------------------|-----|
| Bovine serum albumin<br><i>Escherichia coli</i> cell lysate                                    | MeCAT reagent loaded with Tb(III), Ho(III), Tm(III), Lu(III) | Reversed phase nanoHPLC | Zorbax 300 SB-C <sub>18</sub> (150 mm×75 µm id, 3.5 µm particles) + guard Zorbax 300 SB-C <sub>18</sub> (0.3 mm×5 mm, 3.5 µm particles)                                                                 | Gradient B: from 0-100% B in 75 min<br>(A): 94.9% water/5% acetonitrile/0.1% formic acid<br>(B): 99.9% acetonitrile/0.1% formic acid<br>Gradient A: from 0-100% B in 45 min<br>Gradient B: from 0-100% B in 75 min<br>(A): water/5% acetonitrile/0.1% formic acid<br>(B): 99.9% acetonitrile/0.1% formic acid | ESI- linear triple quadrupole/ion cyclotron resonance Fourier transform -MS | Lower than 10 fmol                  | 228 |
| Bovine serum albumin<br>Human serum albumin<br>Cysteine-containing synthetic standard peptides | MeCAT reagent and DOTA-NHS ester loaded with lanthanides     | Reversed phase nanoHPLC | Zorbax 300 SB-C <sub>18</sub> (150 mm×75 µm id, 3.5 µm particles) + guard Zorbax 300 SB-C <sub>18</sub> (0.3 mm×5 mm, 3.5 µm particles)<br>Zorbax SB-C <sub>18</sub> (150 mm×0.5 mm id, 5 µm particles) | Gradient: from 0-100% B in 35 min<br>(A): water/1% acetonitrile/0.1% formic acid<br>(B): 90% acetonitrile/0.1% formic acid/10% water<br>Gradient: from 0-100% B in 75 min<br>(A): water/0.05% trifluoroacetic acid<br>(B): acetonitrile/0.05% TFA<br>Gradient: 5% B for 3                                     | ESI-ion cyclotron resonance Fourier transform -MS<br>ICP-MS                 | 1.6 fmol for MeCAT labeled peptides | 236 |
| Bovine serum albumin<br>Ovalbumin<br>β-casein<br>Proteinaceous                                 | DTPA loaded with Eu(III)                                     | Reversed phase HPLC     | Symmetry300 C <sub>18</sub> (100 mm×2.1 mm id)                                                                                                                                                          | (A): water/0.05% trifluoroacetic acid<br>(B): acetonitrile/0.05% TFA<br>Gradient: 5% B for 3                                                                                                                                                                                                                  | ICP-MS<br>MALDI-time of flight-MS                                           | NR                                  | 244 |

|                                                                                                                                                                                                                           |                                                                            |                                                            |                                                                                                                                                                                                                              |                                                                                                                                                                                            |                                                                                     |                                                           |     |
|---------------------------------------------------------------------------------------------------------------------------------------------------------------------------------------------------------------------------|----------------------------------------------------------------------------|------------------------------------------------------------|------------------------------------------------------------------------------------------------------------------------------------------------------------------------------------------------------------------------------|--------------------------------------------------------------------------------------------------------------------------------------------------------------------------------------------|-------------------------------------------------------------------------------------|-----------------------------------------------------------|-----|
| binders (animal glue, egg yolk, egg white, whole egg, casein)<br>Vasopressin<br>Oxytocin<br>RNase A<br>Somatostatin<br>Cytochrome C<br>Lysozyme<br>Bovine serum albumin<br>Chymotrypsin<br>Elastase<br>Carbonic anhydrase | azido-DOTA loaded with Eu(III)                                             | Reversed phase HPLC                                        | Zorbax 300SB-C <sub>18</sub> column (150 mm × 1 mm id, 3.5 μm particles)                                                                                                                                                     | min, 5-45% B in 7 min, 45% B for 6 min, 45-70% B in 9 min<br><br>(A): water/0.05% trifluoroacetic acid<br>(B): acetonitrile/0.05% trifluoroacetic acid<br>Gradient: from 5-60% B in 45 min | ESI-ion trap-MS<br>ICP-MS                                                           | 0.2 fmol                                                  | 245 |
| α-lactalbumin                                                                                                                                                                                                             | MeCAT-iodoacetamide reagent loaded with Eu(III), Tb(III), Lu(III), Tm(III) | SDS-PAGE<br>Reversed phase nanoHPLC<br>Reversed phase HPLC | <i>RPC:</i><br>Polaris 3 C <sub>18</sub> -Ether (150 mm×1 mm id)<br><i>nanoRPC:</i><br>Zorbax 300 SB-C <sub>18</sub> (150 mm×75 μm id, 3.5 μm particle) + guard Zorbax 300 SB-C <sub>18</sub> (0.3 mm×5 mm, 3.5 μm particle) | <i>RPC and nanoRPC:</i><br>(A): 94.4% water/5% acetonitrile/0.1% formic acid<br>(B): 99.9% acetonitrile/0.1% formic acid<br>Gradient: from 0-100% B in 35 min                              | ICP-MS<br>ESI-linear triple quadrupole/ion cyclotron resonance Fourier transform-MS | NR                                                        | 223 |
| Lysozyme<br>Human serum albumin<br>Transferrin<br>Human serum samples                                                                                                                                                     | MeCAT-iodoacetamide reagent loaded with Yb(III)                            | SDS-PAGE                                                   | -                                                                                                                                                                                                                            | NR                                                                                                                                                                                         | LA-ICP-MS                                                                           | 750 amol for spot mineralization<br>15 fmol for direct LA | 246 |
| Lysozyme<br>Bovine serum                                                                                                                                                                                                  | MeCAT reagent loaded with                                                  | 2-D strong cation exchange                                 | <i>CEC:</i><br>BioBasic SCX (150                                                                                                                                                                                             | <i>CEC:</i><br>0 – 4 – 10 – 120 – 200                                                                                                                                                      | ICP-MS<br>ESI- linear triple                                                        | Below 300 amol for any MeCAT-                             | 247 |

|                                            |                                                           |                             |                                                                                                                                                         |                                                                                                                                                                                                                                                                                                                                                                                                                                   |                                                                                                                                                                         |                          |     |  |
|--------------------------------------------|-----------------------------------------------------------|-----------------------------|---------------------------------------------------------------------------------------------------------------------------------------------------------|-----------------------------------------------------------------------------------------------------------------------------------------------------------------------------------------------------------------------------------------------------------------------------------------------------------------------------------------------------------------------------------------------------------------------------------|-------------------------------------------------------------------------------------------------------------------------------------------------------------------------|--------------------------|-----|--|
| albumin<br>Transferrin                     | Eu(III), Ho(III),<br>Lu(III), Tm(III)                     | and reversed-<br>phase HPLC | mm×1 mm id, 5 µm<br>particles)<br><i>RPC</i> :<br>Polaris 3 C <sub>18</sub> -Ether<br>(150mm×1 mm id, 5<br>µm particles)                                | mM ammonium acetate<br><i>RPC</i> :<br>(A): water/1%<br>acetonitrile/0.1% formic<br>acid<br>(B): 90%<br>acetonitrile/0.1% formic<br>acid/10% water<br>Gradient: 100% A for 5<br>min, 0-10% B in 31 min,<br>10-20% B in 39 min, 20-<br>40% B in 10 min, 40-<br>80% B in 1 min<br>(A): 94.4% water/5%<br>acetonitrile/0.1% formic<br>acid<br>(B): 99.9%<br>acetonitrile/0.1% formic<br>acid<br>Gradient: from 0-100% B<br>in 50 min | quadrupole/ion<br>cyclotron<br>resonance Fourier<br>transform -MS                                                                                                       | labeled peptide          |     |  |
| β-lactoglobulin<br>Bovine serum<br>albumin | MeCAT-<br>iodoacetamide<br>reagent loaded with<br>Ho(III) | Reversed phase<br>nanoHPLC  | Zorbax 300 SB-C <sub>18</sub><br>(150 mm×75 µm id,<br>3.5 µm particles) +<br>guard Zorbax 300 SB-<br>C <sub>18</sub> (0.3 mm×5 mm,<br>3.5 µm particles) | (A): 98% water/2%<br>acetonitrile/0.1% formic<br>acid<br>(B): 20% water/80%<br>acetonitrile/0.1% formic<br>acid<br>Gradient: 100% A for 15<br>min, 2-50% B in 15 min                                                                                                                                                                                                                                                              | ESI- linear triple<br>quadrupole/ion<br>cyclotron<br>resonance Fourier<br>transform -MS                                                                                 | NR                       | 248 |  |
| Synthetic model<br>peptides                | DOTA-NHS ester<br>loaded with<br>Tm(III) and Tb(III)      | Reversed phase<br>HPLC      | GEAgel SP-300-<br>ODS-AP (150 mm×75<br>µm id, 5 µm particles)                                                                                           | (A): 95% water/0.1%<br>formic<br>acid/5%acetonitrile                                                                                                                                                                                                                                                                                                                                                                              | MALDI-time of<br>flight-MS<br>ESI- linear triple<br>quadrupole/ion<br>cyclotron<br>resonance Fourier<br>transform -MS<br>Nanospray source-<br>quadrupole/ion<br>trap-MS | 0.8 fmol L <sup>-1</sup> | 249 |  |
| Bovine serum<br>albumin<br>α-lactalbumin   | DTPA loaded with<br>Y(III) and Tb(III)                    | Reversed phase<br>HPLC      | PepMap C18 column<br>(150 mm×75 µm id)                                                                                                                  | (A): 95% water/0.1%<br>formic<br>acid/5%acetonitrile                                                                                                                                                                                                                                                                                                                                                                              | MALDI-time of<br>flight-MS<br>ESI-                                                                                                                                      | NR                       | 221 |  |

|                                                                                                                      |                                                                                  |                                                     |                                                                                   |                                                                                                                                                                                                                                                                                                                                                                                                                                                           |                                                                  |                                                                                   |            |
|----------------------------------------------------------------------------------------------------------------------|----------------------------------------------------------------------------------|-----------------------------------------------------|-----------------------------------------------------------------------------------|-----------------------------------------------------------------------------------------------------------------------------------------------------------------------------------------------------------------------------------------------------------------------------------------------------------------------------------------------------------------------------------------------------------------------------------------------------------|------------------------------------------------------------------|-----------------------------------------------------------------------------------|------------|
| <p>β-lactoglobulin<br/>Myoglobin<br/>(nonapo form)<br/>Lysozyme<br/>Bovine<br/>apotransferrin<br/>Bovine insulin</p> |                                                                                  |                                                     |                                                                                   | <p>(B): 85%<br/>acetonitrile/0.1% formic<br/>acid/15% water<br/>Gradient: 4% B for 4.5<br/>min, 4-50% B in 45 min;<br/>50-100% B in 10 min;<br/>100% B for 10 min.<br/>(A): 0.02 M phosphate<br/>buffer, pH 6.5</p>                                                                                                                                                                                                                                       | <p>quadrupole/time of<br/>flight-MS</p>                          |                                                                                   |            |
| <p>RNase A<br/>Cytochrome c<br/>Lysozyme</p>                                                                         | <p>DTPAA loaded<br/>with Ce(III) and<br/>Sm(III)</p>                             | <p>Cation exchange<br/>HPLC</p>                     | <p>TSKGEL SP-5PW (75<br/>mm×7.5 mm id, 10<br/>μm particle)</p>                    | <p>(B): A + 0.5 M<br/>ammonium chloride<br/>Gradient: from 24-55% B<br/>in 16 min, 55-100% B in<br/>14 min<br/>(A): water/0.05%<br/>trifluoroacetic acid<br/>(B): 80%<br/>acetonitrile/0.04%<br/>trifluoroacetic acid/20%<br/>water<br/>Gradient: 100% A for 6<br/>min, 5-70% B in 20 min;<br/>70-95% B in 1 min; 95%<br/>B for 10 min Gradient for<br/>digests: 100% A for 6<br/>min, 5-70% B in 40 min;<br/>70-95% B in 1 min; 95%<br/>B for 10 min</p> | <p>ICP-MS</p>                                                    | <p>0.2 pmol (RNase<br/>A)<br/>1 pmol<br/>(cytochrome c)<br/>7 pmol (lysozyme)</p> | <p>230</p> |
| <p>Synthetic model<br/>peptides<br/>Lysozyme</p>                                                                     | <p>DOTA-NHS-ester<br/>loaded with<br/>Ho(III), Tm(III),<br/>Lu(III), Er(III)</p> | <p>Nano ion pairing<br/>reversed-phase<br/>HPLC</p> | <p>Acclaim PepMap100<br/>C<sub>18</sub> (150 mm×75 μm<br/>id, 5 μm particles)</p> | <p>Gradient: 100% A for 6<br/>min, 5-70% B in 20 min;<br/>70-95% B in 1 min; 95%<br/>B for 10 min Gradient for<br/>digests: 100% A for 6<br/>min, 5-70% B in 40 min;<br/>70-95% B in 1 min; 95%<br/>B for 10 min</p>                                                                                                                                                                                                                                      | <p>ICP-MS<br/>MALDI-time of<br/>flight/time of<br/>flight-MS</p> | <p>NR</p>                                                                         | <p>222</p> |
| <p>Myoglobin<br/>Transferrin<br/>Thyroglobulin</p>                                                                   | <p>Ru-NHS ester</p>                                                              | <p>Size exclusion<br/>HPLC</p>                      | <p>Superdex 200 10/300<br/>GL (300 mm×10 mm<br/>id)</p>                           | <p>200 mM ammonium<br/>acetate buffer, pH 7.2</p>                                                                                                                                                                                                                                                                                                                                                                                                         | <p>ICP-quadrupole-<br/>MS<br/>ICP-sector field-<br/>MS</p>       | <p>1.6 fmol<br/>(myoglobin)<br/>3.2 fmol<br/>(transferrin)<br/>7.0 fmol</p>       | <p>250</p> |



|                                                                                                                                                |                                                                                  |                        |                                                                    |                                                                                                                   |                                                                        |                                                |     |
|------------------------------------------------------------------------------------------------------------------------------------------------|----------------------------------------------------------------------------------|------------------------|--------------------------------------------------------------------|-------------------------------------------------------------------------------------------------------------------|------------------------------------------------------------------------|------------------------------------------------|-----|
| Angiotensin I<br>Angiotensin II<br>Bradykinin<br>MARCKS<br>peptide clip                                                                        | DOTA-NHS-ester<br>loaded with<br>Tb(III), Tm(III)<br>and Ho(III)                 | Reversed phase<br>HPLC | Luna C18(2) HST (2.5<br>mm×3 mm ×100 mm)                           | 98.5% water/1.5%<br>acetonitrile<br>(B): 1.5% water/98.5%<br>acetonitrile<br>Gradient: from 0-100%<br>B in 24 min | ICP-collision cell-<br>MS<br>MALDI-MS<br>ESI-quadrupole/ion<br>trap-MS | (thyroglobulin)<br><br>NR                      | 251 |
| r-fetoprotein<br>Human chorionic<br>gonadotropin<br>Carcinoembryoni<br>c antigen Ovarian<br>tumor antigen<br>Gastrointestinal<br>tumor antigen | Antibodies labeled<br>with Pr(III),<br>Eu(III), Gd(III),<br>Ho(III), and Tb(III) | Size exclusion<br>HPLC | Superdex 200 HR<br>10/30 (300 mm× 10<br>mm id, 13 μm<br>particles) | 100 mM ammonium<br>acetate, pH 6.8                                                                                | UV<br>ICP-MS                                                           | Ranging from 2.6<br>to 8.5 ng mL <sup>-1</sup> | 237 |
